# Supplementary material
Source: ML conference proceedings conference paper supplement (https://proceedings.neurips.cc/paper_files/paper/2017/hash/ad71c82b22f4f65b9398f76d8be4c615-Abstract.html)
Supplement: Supplementary file [file ad71c82b22f4f65b9398f76d8be4c615-Supplemental.zip]

## A Proof of Lemma 1

Just like Russo and Zou [3], we exploit the Donsker–Varadhan variational representation of the relative entropy [20, Corollary 4.15]: for any two probability measures  $\pi, \rho$  on a common measurable space  $(\Omega, \mathcal{F})$ ,

$$D(\pi \| \rho) = \sup_F \left\{ \int_{\Omega} F d\pi - \log \int_{\Omega} e^F d\rho \right\}, \quad (\text{A.1})$$

where the supremum is over all measurable functions  $F : \Omega \rightarrow \mathbb{R}$ , such that  $e^F \in L^1(\rho)$ . From (A.1), we know that for any  $\lambda \in \mathbb{R}$ ,

$$\begin{aligned} D(P_{X,Y} \| P_X \otimes P_Y) &\geq \mathbb{E}[\lambda f(X, Y)] - \log \mathbb{E}[e^{\lambda f(\bar{X}, \bar{Y})}] \\ &\geq \lambda (\mathbb{E}[f(X, Y)] - \mathbb{E}[f(\bar{X}, \bar{Y})]) - \frac{\lambda^2 \sigma^2}{2}, \end{aligned} \quad (\text{A.2})$$

where the second step follows from the subgaussian assumption on  $f(\bar{X}, \bar{Y})$ :

$$\log \mathbb{E}[e^{\lambda(f(\bar{X}, \bar{Y}) - \mathbb{E}[f(\bar{X}, \bar{Y})])}] \leq \frac{\lambda^2 \sigma^2}{2} \quad \forall \lambda \in \mathbb{R}.$$

Inequality (A.2) gives a nonnegative parabola in  $\lambda$ , whose discriminant must be nonpositive, which implies

$$|\mathbb{E}[f(X, Y)] - \mathbb{E}[f(\bar{X}, \bar{Y})]| \leq \sqrt{2\sigma^2 D(P_{X,Y} \| P_X \otimes P_Y)}.$$

The result follows by noting that  $I(X; Y) = D(P_{X,Y} \| P_X \otimes P_Y)$ .

## B Proof of Theorem 3

To prove Theorem 3, we need the following two lemmas.

**Lemma B.1.** *Consider the parallel execution of  $m$  independent copies of  $P_{W|S}$  on independent datasets  $S_1, \dots, S_m$ : for  $t = 1, \dots, m$ , an independent copy of  $P_{W|S}$  takes  $S_t \sim \mu^{\otimes n}$  as input and outputs  $W_t$ . Define  $S^m \triangleq (S_1, \dots, S_m)$ . If under  $\mu$ ,  $P_{W|S}$  satisfies that  $I(\Lambda_W(S); W) \leq \varepsilon$ , then the overall algorithm  $P_{W^m|S^m}$  satisfies  $I(\Lambda_W(S_1), \dots, \Lambda_W(S_m); W^m) \leq m\varepsilon$ .*

*Proof.* The proof is based on the independence among  $(S_t, W_t)$ ,  $t = 1, \dots, m$ , and the chain rule of mutual information.  $\square$

**Lemma B.2.** *Let  $S^m \triangleq (S_1, \dots, S_m)$ , where  $S_t \sim \mu^{\otimes n}$ . If an algorithm  $P_{W,T,R|S^m} : Z^{m \times n} \rightarrow \mathcal{W} \times [m] \times \{\pm 1\}$  satisfies  $I(\Lambda_W(S_1), \dots, \Lambda_W(S_m); W, T, R) \leq \varepsilon$ , and if  $\ell(w, Z)$  is  $\sigma$ -subgaussian for all  $w \in \mathcal{W}$ , then*

$$\mathbb{E}[R(L_{S_T}(W) - L_{\mu}(W))] \leq \sqrt{\frac{2\sigma^2 \varepsilon}{n}}.$$

*Proof.* The proof is based on Lemma 1. Let  $X = (\Lambda_W(S_1), \dots, \Lambda_W(S_m))$ ,  $Y = (W, T, R)$ , and

$$f((\Lambda_W(s_1), \dots, \Lambda_W(s_m)), (w, t, r)) = r L_{s_t}(w).$$

If  $\ell(w, Z)$  is  $\sigma$ -subgaussian under  $Z \sim \mu$  for all  $w \in \mathcal{W}$ , then  $\frac{r}{n} \sum_{i=1}^n \ell(w, Z_{t,i})$  is  $\sigma/\sqrt{n}$ -subgaussian for all  $w \in \mathcal{W}$ ,  $t \in [m]$  and  $r \in \{\pm 1\}$ , and hence  $f(\bar{X}, \bar{Y})$  is  $\sigma/\sqrt{n}$ -subgaussian. Lemma 1 implies that

$$\mathbb{E}[R L_{S_T}(W)] - \mathbb{E}[R L_{\mu}(W)] \leq \sqrt{\frac{2\sigma^2 I(\Lambda_W(S_1), \dots, \Lambda_W(S_m); W, T, R)}{n}}$$

and proves the claim.  $\square$

Note that the upper bound in Lemma B.2 does not depend on  $m$ . With these lemmas, we can prove Theorem 3.

*Proof of Theorem 3.* The proof is an adaptation of a “monitor technique” proposed by Bassily et al. [6]. First, let  $P_{W^m|S^m}$  be the parallel execution of  $m$  independent copies of  $P_{W|S}$ : for  $t = 1, \dots, m$ , an independent copy of  $P_{W|S}$  takes an independent  $S_t \sim \mu^{\otimes n}$  as input and outputs  $W_t$ . Given  $S^m$  and  $W^m$ , let the output of the “monitor” be a sample  $(W^*, T^*, R^*)$  drawn from  $W \times [m] \times \{\pm 1\}$  according to

$$(T^*, R^*) = \arg \max_{t \in [m], r \in \{\pm 1\}} r(L_\mu(W_t) - L_{S_t}(W_t)) \quad \text{and} \quad W^* = W_{T^*}. \quad (\text{B.3})$$

This gives

$$R^*(L_\mu(W^*) - L_{S_{T^*}}(W^*)) = \max_{t \in [m]} |L_\mu(W_t) - L_{S_t}(W_t)|.$$

Taking expectation on both sides, we have

$$\mathbb{E}[R^*(L_\mu(W^*) - L_{S_{T^*}}(W^*))] = \mathbb{E}\left[\max_{t \in [m]} |L_\mu(W_t) - L_{S_t}(W_t)|\right]. \quad (\text{B.4})$$

Note that conditional on  $W^m$ , the tuple  $(W^*, T^*, R^*)$  can take only  $2m$  values, which means that

$$I(\Lambda_W(S_1), \dots, \Lambda_W(S_m); W^*, T^*, R^* | W^m) \leq \log(2m). \quad (\text{B.5})$$

In addition, since  $P_{W|S}$  is assumed to satisfy  $I(\Lambda_W(S); W) \leq \varepsilon$ , Lemma B.1 implies that

$$I(\Lambda_W(S_1), \dots, \Lambda_W(S_m); W^m) \leq m\varepsilon.$$

Therefore, by the chain rule of mutual information and the data processing inequality, we have

$$\begin{aligned} I(\Lambda_W(S_1), \dots, \Lambda_W(S_m); W^*, T^*, R^*) &\leq I(\Lambda_W(S_1), \dots, \Lambda_W(S_m); W^m, W^*, T^*, R^*) \\ &\leq m\varepsilon + \log(2m). \end{aligned}$$

By Lemma B.2 and the assumption that  $\ell(w, Z)$  is  $\sigma$ -subgaussian,

$$\mathbb{E}[R^*(L_{S_{T^*}}(W^*) - L_\mu(W^*))] \leq \sqrt{\frac{2\sigma^2}{n}(m\varepsilon + \log(2m))}. \quad (\text{B.6})$$

Combining (B.6) and (B.4) gives

$$\mathbb{E}\left[\max_{t \in [m]} |L_{S_t}(W_t) - L_\mu(W_t)|\right] \leq \sqrt{\frac{2\sigma^2}{n}(m\varepsilon + \log(2m))}. \quad (\text{B.7})$$

The rest of the proof is by contradiction. Choose  $m = \lfloor 1/\beta \rfloor$ . Suppose the algorithm  $P_{W|S}$  does not satisfy the claimed generalization property, namely,

$$\mathbb{P}[|L_S(W) - L_\mu(W)| > \alpha] > \beta. \quad (\text{B.8})$$

Then by the independence among the pairs  $(S_t, W_t)$ ,  $t = 1, \dots, m$ ,

$$\mathbb{P}\left[\max_{t \in [m]} |L_{S_t}(W_t) - L_\mu(W_t)| > \alpha\right] > 1 - (1 - \beta)^{\lfloor 1/\beta \rfloor} > \frac{1}{2}.$$

Thus

$$\mathbb{E}\left[\max_{t \in [m]} |L_{S_t}(W_t) - L_\mu(W_t)|\right] > \frac{\alpha}{2}. \quad (\text{B.9})$$

Combining (B.7) and (B.9) gives

$$\frac{\alpha}{2} < \sqrt{\frac{2\sigma^2}{n}\left(\frac{\varepsilon}{\beta} + \log \frac{2}{\beta}\right)}. \quad (\text{B.10})$$

The above inequality implies that

$$n < \frac{8\sigma^2}{\alpha^2} \left(\frac{\varepsilon}{\beta} + \log \frac{2}{\beta}\right), \quad (\text{B.11})$$

which contradicts the condition in (16). Therefore, under the condition in (16), the assumption in (B.8) cannot hold. This completes the proof.  $\square$

## C Proof of Theorem 5

To solve the relaxed optimization problem in (26), first note that

$$\begin{aligned} & \inf_{P_{W|S}} \left( \mathbb{E}[L_S(W)] + \frac{1}{\beta} D(P_{W|S} \| Q | P_S) \right) \\ &= \inf_{P_{W|S}} \int_{Z^n} \mu^{\otimes n}(ds) \left( \mathbb{E}[L_S(W) | S = s] + \frac{1}{\beta} D(P_{W|S=s} \| Q) \right) \\ &= \int_{Z^n} \mu^{\otimes n}(ds) \inf_{P_{W|S=s}} \left( \mathbb{E}[L_S(W) | S = s] + \frac{1}{\beta} D(P_{W|S=s} \| Q) \right). \end{aligned}$$

It follows that for each  $s \in Z^n$ , the algorithm  $P_{W|S}^*$  that minimizes (26) satisfies

$$P_{W|S=s}^* = \arg \inf_{P_{W|S=s}} \left( \mathbb{E}[L_S(W) | S = s] + \frac{1}{\beta} D(P_{W|S=s} \| Q) \right). \quad (\text{C.12})$$

This is a simple convex optimization problem. The solution to (C.12) for each  $s \in Z^n$  turns out to be the Gibbs algorithm [21] as described in (27), which does not depend on  $\mu$ .

## D Proof of Corollary 2

We can bound the expected empirical risk of the Gibbs algorithm  $P_{W|S}^*$  as

$$\mathbb{E}[L_S(W)] \leq \mathbb{E}[L_S(W)] + \frac{1}{\beta} D(P_{W|S}^* \| Q | P_S) \quad (\text{D.13})$$

$$\leq \mathbb{E}[L_S(w)] + \frac{1}{\beta} D(\delta_w \| Q) \quad \text{for all } w \in W, \quad (\text{D.14})$$

where  $\delta_w$  is the point mass at  $w$ . The second inequality is due to Theorem 5, as  $\delta_w$  can be viewed as a learning algorithm that ignores the dataset and always outputs  $w$ . Taking  $w = w_o$ , noting that  $\mathbb{E}[L_S(w_o)] = L_\mu(w_o)$ , and combining with the upper bound on the expected generalization error (28), we obtain

$$\mathbb{E}[L_\mu(W)] \leq \inf_{w \in W} L_\mu(w) + \frac{1}{\beta} D(\delta_{w_o} \| Q) + \frac{\beta}{2n}. \quad (\text{D.15})$$

This leads to (29), as  $D(\delta_{w_o} \| Q) = -\log Q(w_o)$  when  $W$  is countable.

## E Proof of Corollary 3

Similar to the proof of Corollary 2, we first bound the expected empirical risk of the Gibbs algorithm  $P_{W|S}^*$ . For any  $a > 0$ ,  $\mathcal{N}(w_o, a^2 \mathbf{I}_d)$  can be viewed as a learning algorithm that ignores the dataset and always draws a hypothesis from this distribution. The nonnegativity of relative entropy and Theorem 5 imply that

$$\mathbb{E}[L_S(W)] \leq \mathbb{E}[L_S(W)] + \frac{1}{\beta} D(P_{W|S}^* \| Q | P_S) \quad (\text{E.16})$$

$$\leq \int_W \mathbb{E}[L_S(w)] \mathcal{N}(w; w_o, a^2 \mathbf{I}_d) dw + \frac{1}{\beta} D(\mathcal{N}(w_o, a^2 \mathbf{I}_d) \| Q) \quad (\text{E.17})$$

$$= \int_W L_\mu(w) \mathcal{N}(w; w_o, a^2 \mathbf{I}_d) dw + \frac{1}{\beta} D(\mathcal{N}(w_o, a^2 \mathbf{I}_d) \| Q). \quad (\text{E.18})$$

Combining with the upper bound on the expected generalization error (28), we obtain

$$\mathbb{E}[L_\mu(W)] \leq \inf_{a>0} \left( \int_W L_\mu(w) \mathcal{N}(w; w_o, a^2 \mathbf{I}_d) dw + \frac{1}{\beta} D(\mathcal{N}(w_o, a^2 \mathbf{I}_d) \| Q) \right) + \frac{\beta}{2n}. \quad (\text{E.19})$$

Since  $\ell(\cdot, z)$  is  $\rho$ -Lipschitz for all  $z \in Z$ , we have that for any  $w \in W$ ,

$$|L_\mu(w) - L_\mu(w_o)| \leq \mathbb{E}[|\ell(w, Z) - \ell(w_o, Z)|] \leq \rho \|w - w_o\|. \quad (\text{E.20})$$

Then

$$\int_{\mathcal{W}} L_{\mu}(w) \mathcal{N}(w; w_o, a^2 \mathbf{I}_d) dw \leq \int_{\mathcal{W}} (L_{\mu}(w_o) + \rho \|w - w_o\|) \mathcal{N}(w; w_o, a^2 \mathbf{I}_d) dw \quad (\text{E.21})$$

$$\leq L_{\mu}(w_o) + \rho a \sqrt{d}. \quad (\text{E.22})$$

Substituting this into (E.19), we obtain (31).

## F Proof of Corollary 4

We prove the result assuming  $|\mathcal{W}| = k$ . When  $\mathcal{W}$  is countably infinite, the proof carries over by replacing  $k$  with  $\infty$ .

First, we upper-bound the expected generalization error via  $I(S; W)$ . We have the following chain of inequalities:

$$I(S; W) \leq I((L_S(w_i))_{i \in [k]}; (L_S(w_i) + N_i)_{i \in [k]}) \quad (\text{F.23})$$

$$\leq \sum_{i=1}^k I(L_S(w_i); L_S(w_i) + N_i) \quad (\text{F.24})$$

$$\leq \sum_{i=1}^k \log \left( 1 + \frac{\mathbb{E}[L_S(w_i)]}{b_i} \right) \quad (\text{F.25})$$

$$= \sum_{i=1}^k \log \left( 1 + \frac{L_{\mu}(w_i)}{b_i} \right), \quad (\text{F.26})$$

where we have used the data processing inequality for mutual information; the fact that for product channels, the mutual information between the overall input and output is upper-bounded by the sum of the input-output mutual information of individual channels [22]; the formula for the capacity of the additive exponential noise channel under an input mean constraint [23]; and the fact that  $\mathbb{E}[L_S(w_i)] = L_{\mu}(w_i)$ . The assumption that  $\ell$  takes values in  $[0, 1]$  implies that  $\ell(w, Z)$  is  $1/2$ -subgaussian for all  $w \in \mathcal{W}$ , and as a consequence of (F.26),

$$\text{gen}(\mu, P_{W|S}) \leq \sqrt{\frac{1}{2n} \sum_{i=1}^k \log \left( 1 + \frac{L_{\mu}(w_i)}{b_i} \right)}. \quad (\text{F.27})$$

Then, we upper-bound the expected empirical risk. From the definition of the algorithm, we have that with probability one,

$$L_S(W) = L_S(W) + N_W - N_W \quad (\text{F.28})$$

$$\leq L_S(w_{i_o}) + N_{i_o} - N_W \quad (\text{F.29})$$

$$\leq L_S(w_{i_o}) + N_{i_o} - \min\{N_i, i \in [k]\}. \quad (\text{F.30})$$

Taking expectation on both sides, we get

$$\mathbb{E}[L_S(W)] \leq L_{\mu}(w_{i_o}) + b_{i_o} - \left( \sum_{i=1}^k \frac{1}{b_i} \right)^{-1}. \quad (\text{F.31})$$

Combining (F.27) and (F.31), we have

$$\mathbb{E}[L_{\mu}(W)] \leq \min_{i \in [k]} L_{\mu}(w_i) + \sqrt{\frac{1}{2n} \sum_{i=1}^k \log \left( 1 + \frac{L_{\mu}(w_i)}{b_i} \right)} + b_{i_o} - \left( \sum_{i=1}^k \frac{1}{b_i} \right)^{-1}, \quad (\text{F.32})$$

which leads to (34) with the fact that  $\log(1+x) \leq x$ .

When  $b_i = i^{1.1}/n^{1/3}$ , using the fact that

$$\sum_{i=1}^k \frac{1}{i^{1.1}} \leq 11 - 10k^{-1/10} \quad (\text{F.33})$$

and upper-bounding  $L_\mu(w_i)$ 's by 1, we get

$$\mathbb{E}[L_\mu(W)] \leq \min_{i \in [k]} L_\mu(w_i) + \frac{1}{n^{1/3}} \left( \sqrt{\frac{1}{2} (11 - 10k^{-1/10})} + i_o^{1.1} - \frac{1}{11 - 10k^{-1/10}} \right) \quad (\text{F.34})$$

$$\leq \min_{i \in [k]} L_\mu(w_i) + \frac{3 + i_o^{1.1}}{n^{1/3}}, \quad (\text{F.35})$$

which proves (35).
